# Supplementary material for: Contact With Persons With Mental Illness and Willingness to Live Next Door to Them: Two Waves of a California Survey of Adults
Source: Atypon-hosted journal article supplement (doi:10.1176/appi.ps.202000064), 2020-11-10
Supplement: appi.ps.202000064.ds001.pdf [file appi.ps.202000064.ds001.pdf]

## Online Supplement

**Summary of Call Attempts**

Summary of call attempts made to 2013 survey respondents who were thus eligible for the 2014 follow-up survey. Source: Field Research Corporation, San Francisco, CA.

---

|                                                          |              |
|----------------------------------------------------------|--------------|
| <b>Total listings available for the follow-up survey</b> | <b>2,568</b> |
| Wrong number/disconnected/not a working number           | 362          |
| Answering machine/busy signal                            | 507          |
| No answer                                                | 72           |
| Respondent unavailable                                   | 39           |
| Fax/modem/pager                                          | 10           |
| Blocked number                                           | 12           |
| Refusal                                                  | 230          |
| Partial complete/terminated during the interview         | 28           |
| Other non-complete                                       | 23           |
| <b>Completed the follow-up survey</b>                    | <b>1,285</b> |

---

### Sensitivity Analyses

Supplemental multivariable models exploring the use of a three category conceptualization of change in contact (odds-ratio estimates). Results (marginally significant opposite direction of associations between increased and decreased contact and symmetry in effect sizes) support our use of a continuous change in contact variable in the main results, given limited sample sizes in each change category that limit statistical power.

|                                                   | Model 1 |            | Model 2 |            |
|---------------------------------------------------|---------|------------|---------|------------|
|                                                   | OR      | 95% CI     | OR      | 95% CI     |
| English-preferring Asian                          | 1.84    | 0.70-4.85  | 2.03    | 0.77-5.38  |
| Asian language-preferring Asian                   | 8.58*** | 4.05-18.18 | 5.22*** | 2.46-11.10 |
| English-preferring Black                          | 0.71    | 0.39-1.29  | 0.69    | 0.38-1.23  |
| English-preferring Latino                         | 1.21    | 0.65-2.26  | 1.25    | 0.69-2.28  |
| Spanish-preferring Latino                         | 3.96*** | 1.91-8.19  | 3.09**  | 1.52-6.32  |
| Other race/ethnicity /language                    | 0.39*   | 0.16-0.96  | 0.39*   | 0.17-0.94  |
| Female                                            | 0.99    | 0.65-1.50  | 0.96    | 0.64-1.44  |
| Age 18 to 29 (vs 30+)                             | 0.38**  | 0.21-0.68  | 0.37*** | 0.21-0.66  |
| Ever had a mental health problem                  | 0.67    | 0.42-1.06  | 0.73    | 0.46-1.15  |
| Have a family member with a mental health problem | 0.64*   | 0.41-0.98  | 0.67    | 0.44-1.01  |
| Wave                                              | 0.62**  | 0.45-0.85  | 0.62**  | 0.45-0.85  |
| W1 Contact                                        | 0.59*   | 0.35-0.99  | 0.63    | 0.38-1.05  |
| Increased contact                                 | 0.50    | 0.24-1.08  | 0.49    | 0.23-0.81  |
| Decreased contact                                 | 1.94    | 0.94-4.02  | 2.00    | 0.97-4.10  |
| W1 Belief in dangerousness                        | -       | -          | 3.81*** | 2.29-6.34  |
| Reduced dangerousness (W1-W2)                     | -       | -          | 0.71    | 0.42-1.19  |

English-preferring whites are the reference group for tests of race/ethnicity/language.

\* $p < 0.05$ . \*\* $p < 0.01$ . \*\*\* $p < 0.001$ .
